# Supplementary material for: Ultrasmall magnetic field-effect and sign reversal in transistors based on donor/acceptor systems
Source: publisher site journal article supplement (doi:10.3762/bjnano.8.112), 2017-05-19
Supplement: Additional file 1 [file 2190-4286-8-112-S1.pdf]

# Supporting Information

for

## **Ultrasmall magnetic field-effect and sign reversal in transistors based on donor/acceptor systems**

Thomas Reichert<sup>1</sup> and Tobat P. I. Saragi\*<sup>1,2</sup>

Address: <sup>1</sup>Macromolecular Chemistry and Molecular Materials, Department of Mathematics and Science, Center for Interdisciplinary Nanostructure Science and Technology (CINsaT), University of Kassel, Heinrich-Plett-Straße 40, 34132 Kassel, Germany and <sup>2</sup>Present address: Accenture GmbH, Kaistraße 20, 40221 Düsseldorf, Germany

Email: Tobat P. I. Saragi\* - tobat.saragi@gmx.de

\* Corresponding author

**The dependency of magnetoresistance on the drain and gate voltage for Spiro-TTB/HAT-CN for different mixing ratios and resulting fit parameters**

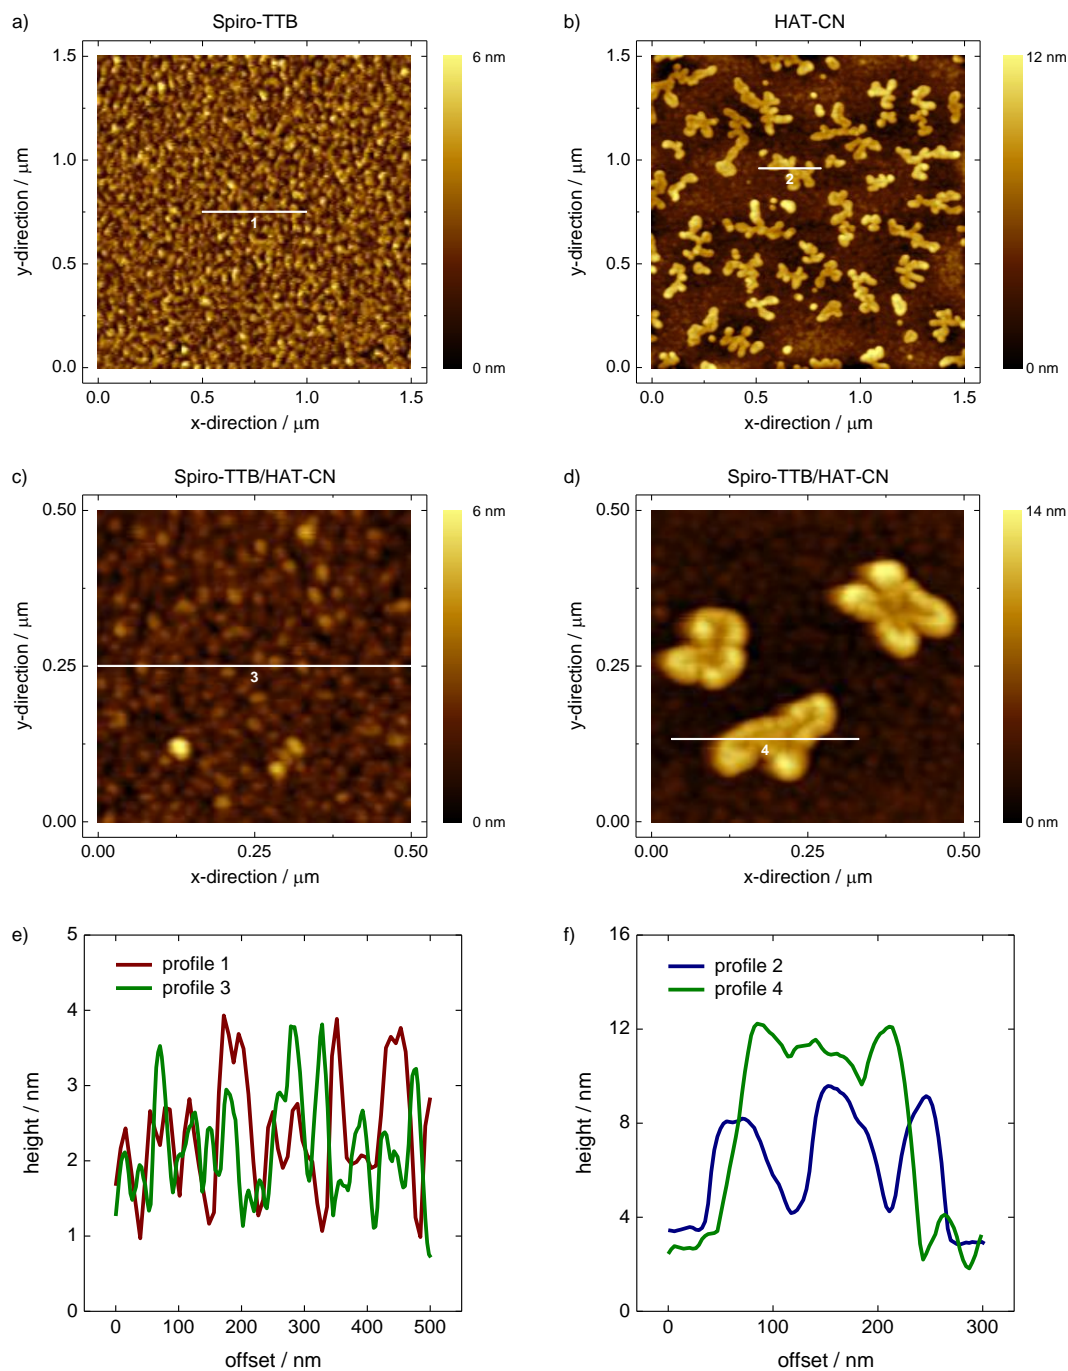

**Figure S1:** AFM measurements of a) 130 nm thin Spiro-TTB films, b) 1 nm thin HAT-CN films and c), d) 20 nm thin coevaporated Spiro-TTB/HAT-CN films (51:49) as well as e), f) representative height profile-lines of the corresponding surface structures are shown. The mixed Spiro-TTB/HAT-CN thin-film system contains relative smooth areas with similar surface features as individual Spiro-TTB films *and* island-like structures of similar form and dimension as the surface structures of individual HAT-CN films.

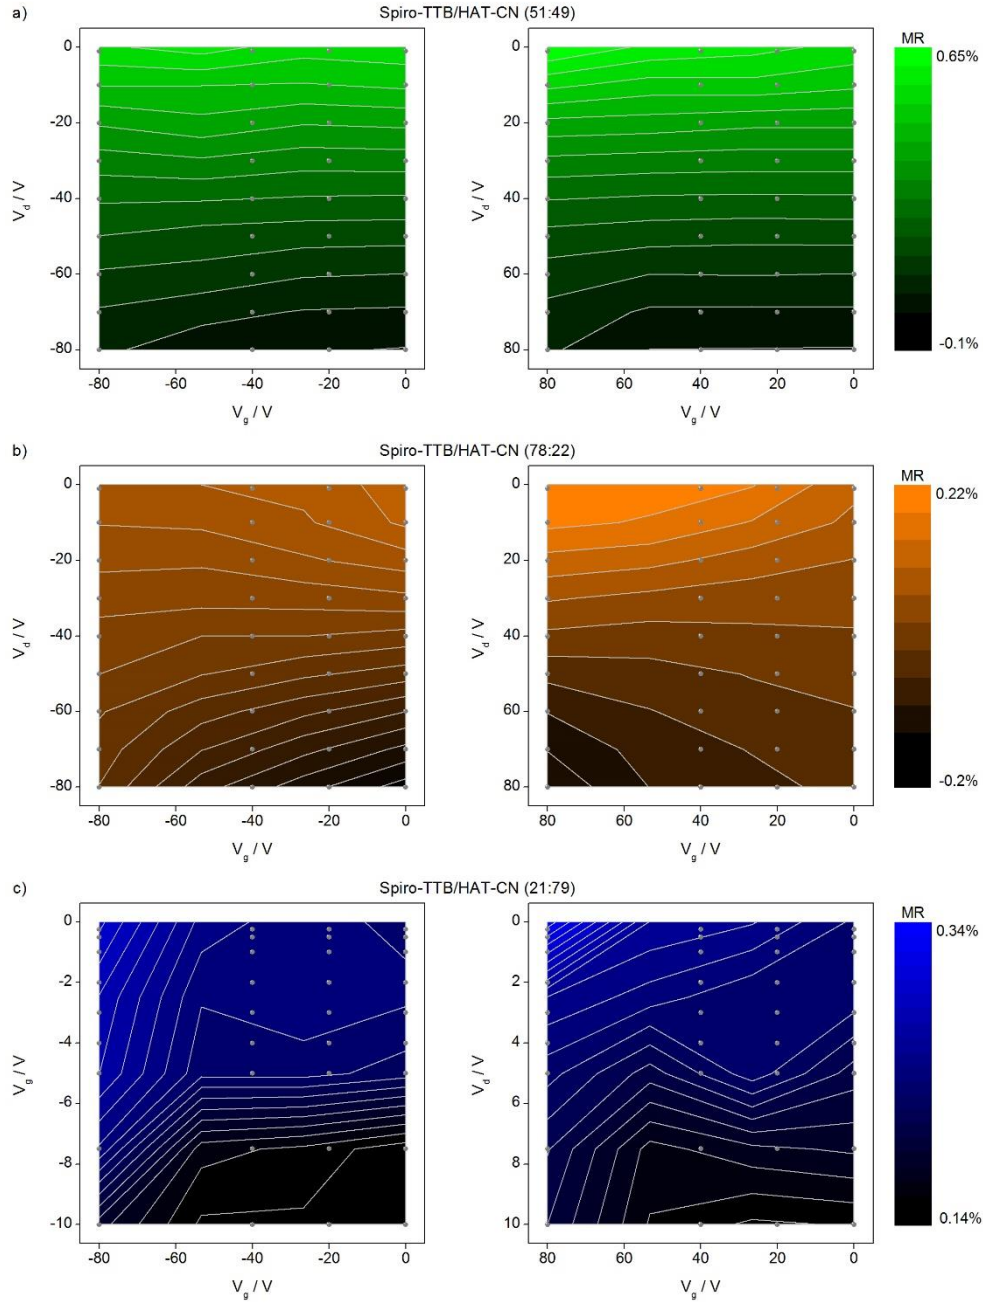

**Table S1:** Fit results of the  $MR(B)$  curves for Spiro-TTB/HAT-CN with a mixing ratio of 51:49 at different drain voltages.

| $V_d$ [V]              | Non-Lorentz Fit    |              |        | Lorentz Fit        |              |        |
|------------------------|--------------------|--------------|--------|--------------------|--------------|--------|
|                        | $MR_\infty^a$ [mT] | $B_0^a$ [mT] | $QF^b$ | $MR_\infty^a$ [mT] | $B_0^a$ [mT] | $QF^b$ |
| Spiro-TTB/HAT-CN (1:1) |                    |              |        |                    |              |        |
| 1                      | 0.760±0.015        | 1.86±0.09    | 0.992  | 0.692±0.020        | 4.32±0.56    | 0.944  |
| 2.5                    | 0.743±0.017        | 1.93±0.10    | 0.991  | 0.676±0.018        | 4.44±0.50    | 0.950  |
| 5                      | 0.701±0.008        | 2.02±0.08    | 0.992  | 0.636±0.013        | 4.51±0.40    | 0.960  |
| -5                     | 0.703±0.008        | 1.95±0.10    | 0.990  | 0.638±0.013        | 4.45±0.39    | 0.961  |
| 10                     | 0.608±0.010        | 1.98±0.08    | 0.993  | 0.552±0.017        | 4.62±0.59    | 0.941  |
| 15                     | 0.529±0.010        | 2.06±0.08    | 0.992  | 0.479±0.015        | 4.74±0.61    | 0.940  |
| 25                     | 0.401±0.007        | 2.28±0.09    | 0.992  | 0.361±0.012        | 5.18±0.67    | 0.933  |
| 40                     | 0.244±0.005        | 2.50±0.10    | 0.990  | 0.219±0.006        | 5.66±0.60    | 0.940  |
| 80                     | -0.076±0.002       | 2.15±0.12    | 0.988  | -0.069±0.002       | 4.96±0.66    | 0.934  |
| 90                     | -0.131±0.003       | 2.22±0.11    | 0.990  | -0.118±0.003       | 5.16±0.50    | 0.950  |
| 100                    | -0.175±0.004       | 2.40±0.10    | 0.990  | -0.158±0.004       | 5.54±0.58    | 0.941  |

<sup>a</sup>Applied fit parameters according to Equations S1 and S2. The Lorentzian line shape can be described by the following equation:

$$MR(B) = MR_\infty \frac{B^2}{B^2 + B_0^2} \quad (S1)$$

while the Non-Lorentzian line shape is written as

$$MR(B) = MR_\infty \frac{B^2}{(|B| + B_0)^2} \quad (S2)$$

whereas  $B$  is the applied magnetic field,  $MR_\infty$  is the saturation value of MR for an infinite magnetic-field strength,  $B_0$  gives the half width at half maximum of MR and  $B_0$  gives the half width at quarter maximum of MR.

<sup>b</sup>QF = Quality of fit. The best fit has a QF value of 1.

**Table S2:** Fit results of the MR( $B$ ) curves for Spiro-TTB/HAT-CN with a mixing ratio of 78:22 at different drain voltages.

| $V_d$ [V]              | Non-Lorentz Fit    |              |        | Lorentz Fit        |              |        |
|------------------------|--------------------|--------------|--------|--------------------|--------------|--------|
|                        | $MR_\infty^a$ [mT] | $B_0^a$ [mT] | $QF^b$ | $MR_\infty^a$ [mT] | $B_0^a$ [mT] | $QF^b$ |
| Spiro-TTB/HAT-CN (4:1) |                    |              |        |                    |              |        |
| -1                     | 0.166±0.001        | 1.80±0.07    | 0.993  | 0.151±0.005        | 4.28±0.67    | 0.933  |
| -5                     | 0.168±0.002        | 1.73±0.13    | 0.987  | 0.154±0.005        | 4.17±0.58    | 0.942  |
| -10                    | 0.156±0.003        | 1.80±0.17    | 0.983  | 0.143±0.004        | 4.32±0.48    | 0.952  |
| -12.5                  | 0.143±0.004        | 1.73±0.26    | 0.974  | 0.130±0.003        | 4.06±0.41    | 0.960  |
| -15                    | 0.133±0.002        | 1.74±0.13    | 0.987  | 0.122±0.004        | 4.18±0.53    | 0.947  |
| -20                    | 0.116±0.003        | 1.70±0.24    | 0.976  | 0.107±0.003        | 4.18±0.46    | 0.954  |
| -60                    | -0.138±0.002       | 2.66±0.17    | 0.983  | -0.123±0.005       | 5.94±0.81    | 0.919  |
| -70                    | -0.201±0.004       | 2.57±0.19    | 0.981  | -0.178±0.006       | 5.63±0.70    | 0.930  |
| -80                    | -0.262±0.005       | 2.41±0.19    | 0.981  | -0.235±0.003       | 5.49±0.66    | 0.934  |
| -90                    | -0.319±0.006       | 2.46±0.21    | 0.979  | -0.286±0.008       | 5.57±0.62    | 0.938  |
| -100                   | -0.369±0.007       | 2.49±0.20    | 0.980  | -0.369±0.007       | 5.64±0.65    | 0.935  |

<sup>a</sup>Applied fit parameters according to Equations S1 and S2.

<sup>b</sup>QF = Quality of fit. The best fit has a QF value of 1.

**Table S3:** Fit results of the  $MR(B)$  curves for Spiro-TTB/HAT-CN with a mixing ratio of 21:79 at different drain voltages.

| $V_d$ [V]              | Non-Lorentz Fit    |              |        | Lorentz Fit        |              |        |
|------------------------|--------------------|--------------|--------|--------------------|--------------|--------|
|                        | $MR_\infty^a$ [mT] | $B_0^a$ [mT] | $QF^b$ | $MR_\infty^a$ [mT] | $B_0^a$ [mT] | $QF^b$ |
| Spiro-TTB/HAT-CN (1:4) |                    |              |        |                    |              |        |
| 0.1                    | 0.348±0.005        | 2.78±0.18    | 0.982  | 0.309±0.012        | 6.16±0.88    | 0.911  |
| 0.25                   | 0.344±0.014        | 2.83±0.48    | 0.952  | 0.305±0.009        | 6.12±0.69    | 0.931  |
| 0.5                    | 0.345±0.008        | 2.79±0.26    | 0.974  | 0.308±0.010        | 6.18±0.74    | 0.926  |
| 1                      | 0.342±0.010        | 2.98±0.35    | 0.965  | 0.303±0.011        | 6.52±0.84    | 0.916  |
| 2.5                    | 0.318±0.008        | 3.03±0.31    | 0.969  | 0.281±0.011        | 6.54±0.89    | 0.911  |
| 5                      | 0.289±0.011        | 3.13±0.45    | 0.955  | 0.256±0.009        | 6.68±0.82    | 0.918  |
| 10                     | 0.234±0.010        | 3.18±0.50    | 0.950  | 0.207±0.007        | 6.93±0.77    | 0.923  |

<sup>a</sup>Applied fit parameters according to Equations S1 and S2.

<sup>b</sup>QF = Quality of fit. The best fit has a QF value of 1.
